# Supplementary material for: Running on empty: a longitudinal global study of psychological well-being among runners during the COVID-19 pandemic
Source: HighWire-hosted journal article supplement (doi:10.1136/bmjopen-2022-063455), 2022-09-01
Supplement: bmjopen-2022-063455supp001_data_supplement.pdf [file bmjopen-2022-063455supp001_data_supplement.pdf]

**SUPPLEMENTARY MATERIAL****Running on empty: A longitudinal global study of psychological well-being among runners during the COVID-19 pandemic**

Helene Tilma Vistisen<sup>1,2</sup>, Kim Mannemar Sønderskov<sup>3,4</sup>, Peter Thisted Dinesen<sup>5</sup>,  
René Børge Korsgaard Brund<sup>6</sup>, Rasmus Østergaard Nielsen<sup>7,8</sup>,  
Søren Dinesen Østergaard<sup>1,2</sup>

<sup>1</sup> Department of Affective Disorders, Aarhus University Hospital, Aarhus, Denmark;

<sup>2</sup> Department of Clinical Medicine, Aarhus University, Aarhus, Denmark

<sup>3</sup> Department of Political Science, Aarhus University, Aarhus, Denmark

<sup>4</sup> Centre for the Experimental-Philosophical Study of Discrimination, Aarhus University, Aarhus, Denmark

<sup>5</sup> Department of Political Science, University of Copenhagen, Copenhagen, Denmark

<sup>6</sup> Sport Sciences, Department of Health Science and Technology, Aalborg University, Aalborg, Denmark

<sup>7</sup> Department of Public Health, Aarhus University, Aarhus, Denmark

<sup>8</sup> Research Unit for General Practice, Aarhus, Denmark

## Supplementary Methods

### Specification of square root-, natural logarithmic- and quadratic models:

The square root and natural log models were based on the following equation:

$$WHO5_{it} = \beta_0 + \beta_1 Deaths_{it} + \beta_2 RunningActivity_{it} + \beta_3 Injury_{it} + a_i + u_t + \epsilon_{it}$$

In the square root model, *Deaths* is replaced by  $\sqrt{\text{deaths}/10,000}$ . In the natural log model, *Deaths* is replaced by  $\text{Ln}(\text{deaths}/10,000 + 0.01)$ . Due to zero-values, 0.01 is added to the number of deaths per 10,000 before log-transformation.

The quadratic model was defined as follows:

$$WHO5_{it} = \beta_0 + \beta_{1a} Deaths_{it} + \beta_{1b} deaths_{it}^2 + \beta_2 RunningActivity_{it} + \beta_3 Injury_{it} + a_i + u_t + \epsilon_{it}$$

In all three models, *Deaths* is a numerical discrete variable measuring the number of deaths per 10,000 inhabitants in *i*'s country of residence at time period *t* (*t* represents periods of 14 days), *RunningActivity<sub>it</sub>* is a continuous variable measuring *i*'s running activity (total meters) at time period *t*, *Injury<sub>it</sub>* measures the number of days where activity was affected by a running injury or problem at time period *t*. The three remaining terms represent unobserved factors affecting *WHO5<sub>it</sub>*: *a<sub>i</sub>* is time-invariant and individual-specific; *u<sub>t</sub>* is unit-invariant and time-specific; and *ε<sub>it</sub>* represents unobserved determinants of *WHO5<sub>it</sub>* that vary across both individual and time. To remove *a<sub>i</sub>*, we included a full set of individual-level fixed effects, and to remove *u<sub>t</sub>* we included time-fixed effects.

**Supplementary Figure 1.**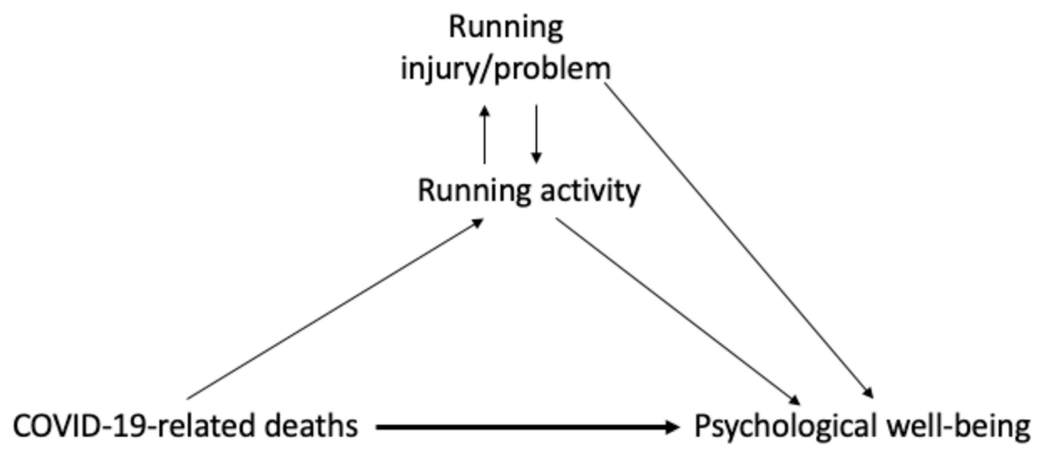

**Supplementary Figure 2. Number of participants and WHO-5 observations per country**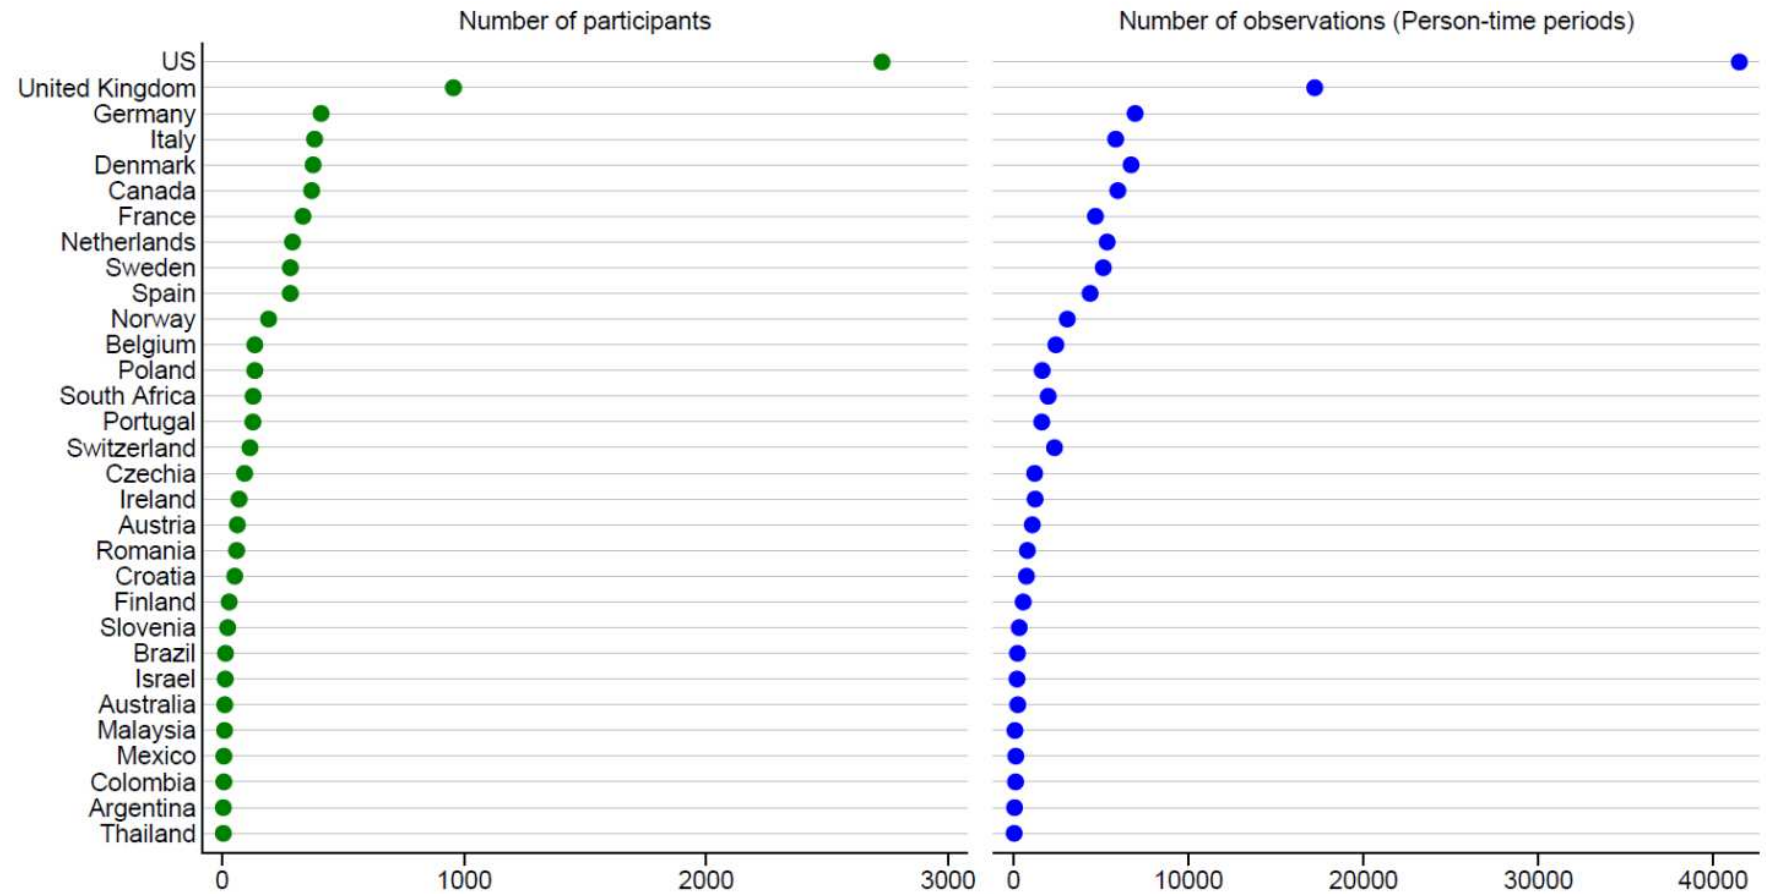

Note: Countries with less than five participants are not included in the graph. A total of 55 countries have less than five participants, and together they account for 105 participants and 1400 WHO-5 records.

**Supplementary Figure 3.** Number of WHO-5 observations, completed injury-questionnaires, running sessions, and total running distance over the course of the study period

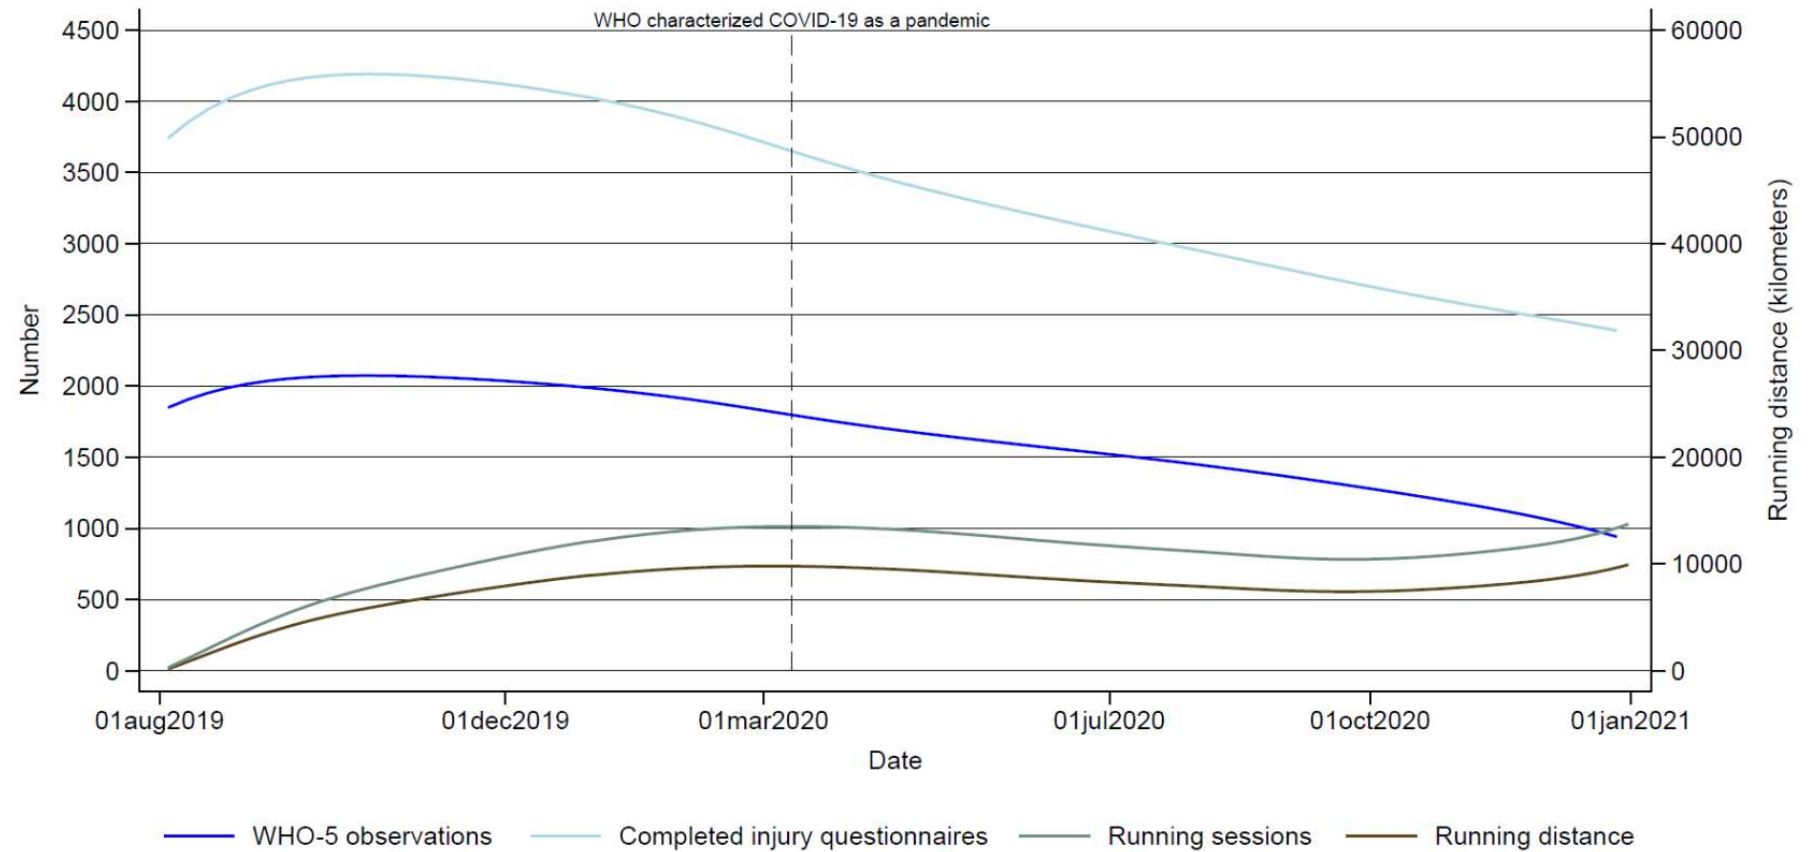

Note: The number of WHO-5 observations, injury questionnaires, running sessions and running distance are generated using a lowess smoother.

**Supplementary Table 1. Individual fixed-effects linear-regression analyses with time fixed effects and excluding one country at the time (linear specification\*). US and Belgium are reported separately, as they account for the highest proportion of participants and the highest number of COVID-19 related deaths per 10,000, respectively.**

|                                                                       | Regression coefficient ( $\beta_1 Deaths_{it}$ )<br>(95% CI) | p-value          |
|-----------------------------------------------------------------------|--------------------------------------------------------------|------------------|
| Leave-one-out<br>(min/max of regression coefficient excl. the 95% CI) | -1.67 / -1.12                                                | All $\leq 0.001$ |
| Excluding US                                                          | -1.12 (-1.62; -0.62)                                         | <0,001           |
| Excluding Belgium                                                     | -1.62 (-2.49; -0.76)                                         | <0,001           |

\*Model:  $WHO5_{it} = \beta_0 + \beta_1 Deaths_{it} + \beta_2 RunningActivity_{it} + \beta_3 Injury_{it} + \alpha_i + u_t + \epsilon_{it}$

where *Death* is a continuous variable measuring the number of deaths per 10,000 inhabitants (cf. Table 1) in *i*'s country of residence at time period *t* (*t* represents periods of 14 days), *RunningActivity<sub>it</sub>* is a continuous variable measuring *i*'s running activity (total meters) at time period *t*, *Injury* measures the number of days where activity was affected by a running injury or problem at time period *t*. The three remaining terms represent unobserved factors affecting  $WHO5_{it}$ :  $\alpha_i$  is time-invariant and individual-specific;  $u_t$  is unit-invariant and time-specific; and  $\epsilon_{it}$  represents unobserved determinants of  $WHO5_{it}$  that vary across both individual and time. To remove  $\alpha_i$  we included a full set of individual-level fixed effects, and to remove  $u_t$  we included time-fixed effects.

**Supplementary Figure 4. Non-linear association between COVID-19-related deaths per 10,000 and psychological well-being (WHO-5 total score), based on a square root model (top figure), a natural log model (middle figure), and a quadratic model (bottom figure).**

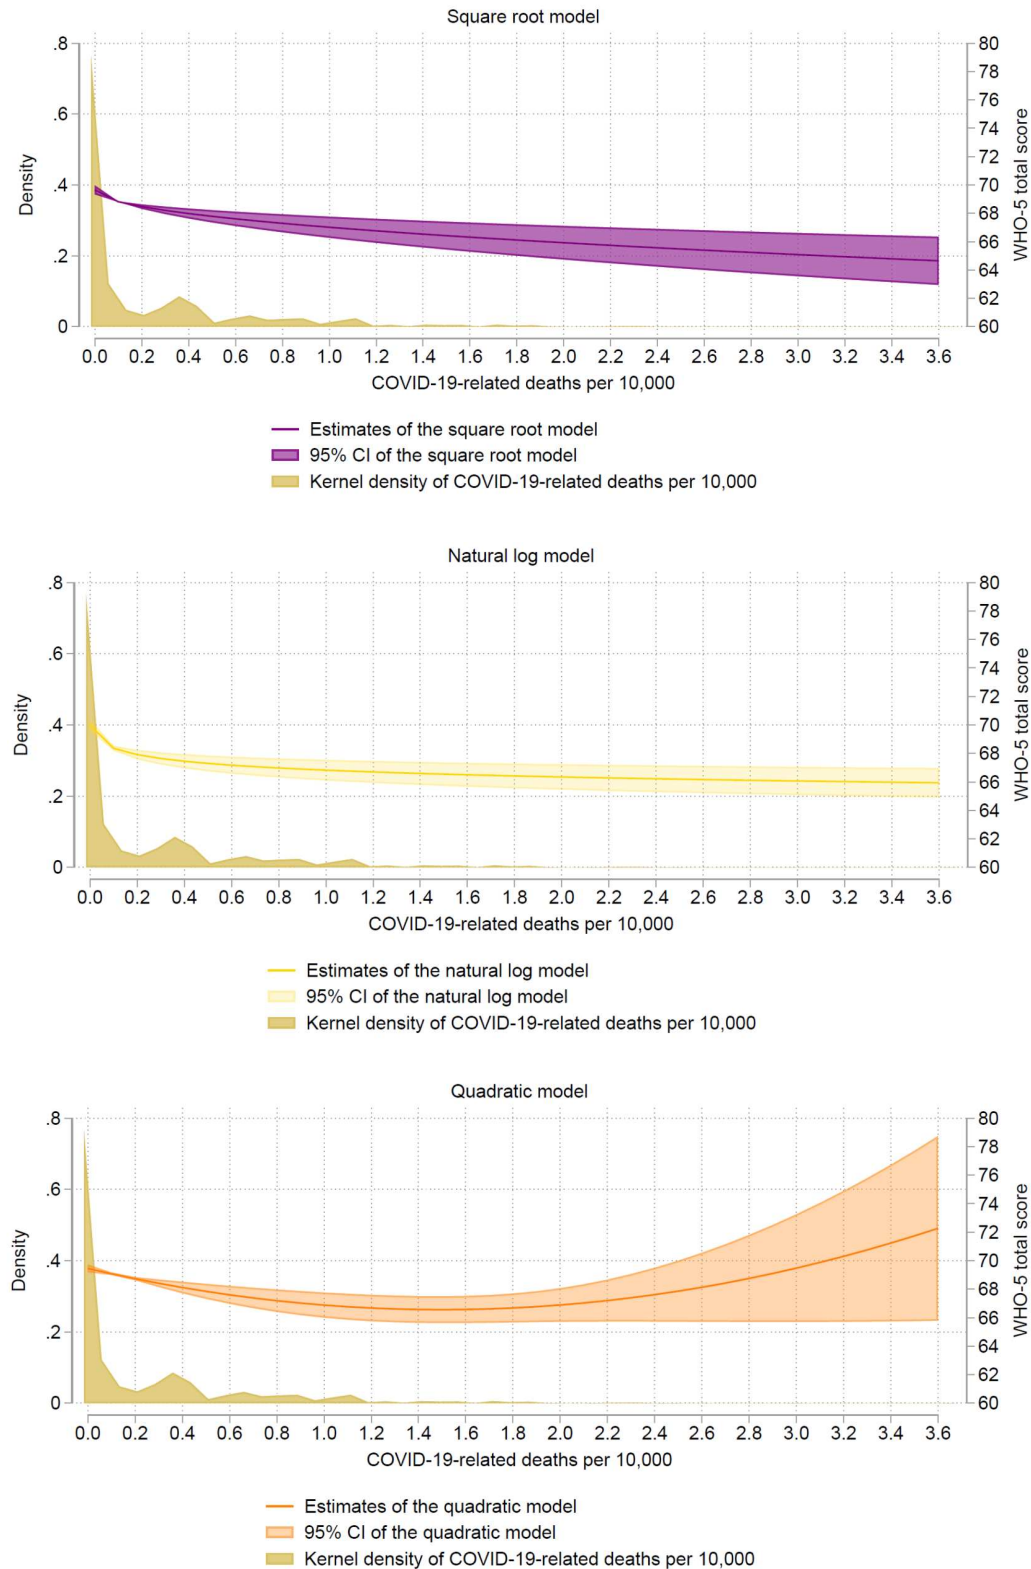

**Supplementary Table 2. Individual fixed-effects linear-regression analyses with time-fixed effects exploring non-linear associations.**

| Model                                               | Regression coefficient ( $\beta_1 Deaths_{it}$ )<br>(95% CI) | p-value |
|-----------------------------------------------------|--------------------------------------------------------------|---------|
| Square root*:                                       |                                                              |         |
| $DEATHS = \sqrt{\text{deaths}/10,000}$              | -2.72 (-3.84; -1.61)                                         | <0.001  |
| Natural log*:                                       |                                                              |         |
| $DEATHS = \text{Ln}((\text{deaths}/10,000)+0.01)**$ | -0.70 (-0.95; -0.44)                                         | <0.001  |
| Quadratic***:                                       |                                                              |         |
| $DEATHS = \text{deaths}/10.000$                     | -3.86 (-5.96; -1.77)                                         | <0,001  |
| $DEATHS = (\text{deaths}/10,000)^2$                 | 1.29 (0.27; 2.31)                                            | 0.013   |

Observations: 84,679. Individuals: 6,222.

\*Model:  $WHO5_{it} = \beta_0 + \beta_1 DEATHS_{it} + \beta_2 RunningActivity_{it} + \beta_3 Injury_{it} + a_i + u_t + \epsilon_{it}$

\*\* Due to zero-values, 0.1 is added to the number of deaths per 10,000 before log-transformation

\*\*\* Model:  $WHO5_{it} = \beta_0 + \beta_{1a} DEATHS_{it} + \beta_{1b} DEATHS_{it}^2 + \beta_2 RunningActivity_{it} + \beta_3 Injury_{it} + a_i + u_t + \epsilon_{it}$  where *Death* is a numerical discrete variable measuring the number of deaths per 10,000 inhabitants (cf. Table 1) in *i*'s country of residence at time period *t* (*t* represents periods of 14 days), *RunningActivity* is a continuous variable measuring *i*'s running activity (total meters) at time period *t*, *Injury* measures the number of days where activity was affected by a running injury or problem at time period *t*. The three remaining terms represent unobserved factors affecting *WHO5*: *a<sub>i</sub>* is time-invariant and individual-specific; *u<sub>t</sub>* is unit-invariant and time-specific; and *ε<sub>it</sub>* represents unobserved determinants of *WHO5* that vary across both individual and time. To remove *a<sub>i</sub>*, we included a full set of individual-level fixed effects, and to remove *u<sub>t</sub>* we included time-fixed effects.
